# Supplementary material for: Effect of a Diet-Induced Obesity on the Progeny Response in a Murine Model
Source: MDPI journal article supplement (doi:10.3390/nu15234970), 2023-11-30
Supplement: s1 [file nutrients-2632981-S1.xlsx]

## Sheet: Fig_2A
Sample	Animal	Maternal_diet	Litter_size	Generation	Day	Weight
1	1	M_LE	10_Litter	F0_Dams	1	35.56
2	2	M_LE	10_Litter	F0_Dams	1	34.50
3	3	M_LE	10_Litter	F0_Dams	1	37.77
4	4	M_LE	10_Litter	F0_Dams	1	34.04
5	5	M_HE	10_Litter	F0_Dams	1	37.28
6	6	M_HE	10_Litter	F0_Dams	1	36.83
7	7	M_HE	10_Litter	F0_Dams	1	42.75
8	8	M_HE	10_Litter	F0_Dams	1	35.78
9	9	M_LE	10_Litter	F0_Dams	1	37.45
10	10	M_LE	10_Litter	F0_Dams	1	39.68
11	11	M_LE	10_Litter	F0_Dams	1	35.74
12	12	M_LE	10_Litter	F0_Dams	1	37.83
13	13	M_HE	5_Litter	F0_Dams	1	43.77
14	14	M_HE	10_Litter	F0_Dams	1	37.64
15	15	M_HE	5_Litter	F0_Dams	1	42.84
16	16	M_HE	10_Litter	F0_Dams	1	41.62
17	17	M_LE	5_Litter	F0_Dams	1	44.83
18	18	M_LE	5_Litter	F0_Dams	1	43.45
19	19	M_HE	10_Litter	F0_Dams	1	43.48
20	20	M_HE	5_Litter	F0_Dams	1	44.93
21	21	M_LE	5_Litter	F0_Dams	1	42.40
22	22	M_LE	5_Litter	F0_Dams	1	35.06
23	23	M_LE	5_Litter	F0_Dams	1	43.85
24	24	M_HE	10_Litter	F0_Dams	1	43.52
25	25	M_HE	5_Litter	F0_Dams	1	46.12
26	26	M_HE	5_Litter	F0_Dams	1	41.30
27	27	M_HE	10_Litter	F0_Dams	1	46.52
28	1	M_LE	10_Litter	F0_Dams	2	35.46
29	2	M_LE	5_Litter	F0_Dams	2	34.15
30	3	M_LE	10_Litter	F0_Dams	2	40.48
31	4	M_LE	5_Litter	F0_Dams	2	34.59
32	5	M_HE	5_Litter	F0_Dams	2	37.06
33	6	M_HE	5_Litter	F0_Dams	2	36.97
34	7	M_HE	10_Litter	F0_Dams	2	41.42
35	8	M_HE	10_Litter	F0_Dams	2	35.84
36	9	M_LE	10_Litter	F0_Dams	2	37.12
37	10	M_LE	5_Litter	F0_Dams	2	38.42
38	11	M_LE	5_Litter	F0_Dams	2	34.36
39	12	M_LE	10_Litter	F0_Dams	2	37.52
40	13	M_HE	5_Litter	F0_Dams	2	41.39
41	14	M_HE	10_Litter	F0_Dams	2	40.33
42	15	M_HE	5_Litter	F0_Dams	2	42.25
43	16	M_HE	10_Litter	F0_Dams	2	43.51
44	17	M_LE	5_Litter	F0_Dams	2	43.26
45	18	M_LE	5_Litter	F0_Dams	2	41.46
46	19	M_HE	10_Litter	F0_Dams	2	44.72
47	20	M_HE	5_Litter	F0_Dams	2	42.28
48	21	M_LE	5_Litter	F0_Dams	2	38.93
49	22	M_LE	5_Litter	F0_Dams	2	35.03
50	23	M_LE	5_Litter	F0_Dams	2	43.14
51	24	M_HE	10_Litter	F0_Dams	2	44.60
52	25	M_HE	5_Litter	F0_Dams	2	45.39
53	26	M_HE	5_Litter	F0_Dams	2	38.69
54	27	M_HE	10_Litter	F0_Dams	2	41.06
55	1	M_LE	10_Litter	F0_Dams	10	41.25
56	2	M_LE	5_Litter	F0_Dams	10	41.65
57	3	M_LE	10_Litter	F0_Dams	10	43.85
58	4	M_LE	5_Litter	F0_Dams	10	42.20
59	5	M_HE	5_Litter	F0_Dams	10	43.96
60	6	M_HE	5_Litter	F0_Dams	10	40.33
61	7	M_HE	10_Litter	F0_Dams	10	47.56
62	8	M_HE	10_Litter	F0_Dams	10	46.06
63	9	M_LE	10_Litter	F0_Dams	10	42.83
64	10	M_LE	5_Litter	F0_Dams	10	43.45
65	11	M_LE	5_Litter	F0_Dams	10	38.90
66	12	M_LE	10_Litter	F0_Dams	10	38.70
67	13	M_HE	5_Litter	F0_Dams	10	43.87
68	14	M_HE	10_Litter	F0_Dams	10	41.96
69	15	M_HE	5_Litter	F0_Dams	10	43.26
70	16	M_HE	10_Litter	F0_Dams	10	44.56
71	17	M_LE	5_Litter	F0_Dams	10	47.95
72	18	M_LE	5_Litter	F0_Dams	10	45.59
73	19	M_HE	10_Litter	F0_Dams	10	50.46
74	20	M_HE	5_Litter	F0_Dams	10	45.83
75	21	M_LE	5_Litter	F0_Dams	10	45.46
76	22	M_LE	5_Litter	F0_Dams	10	43.89
77	23	M_LE	5_Litter	F0_Dams	10	51.18
78	24	M_HE	10_Litter	F0_Dams	10	52.56
79	25	M_HE	5_Litter	F0_Dams	10	51.14
80	26	M_HE	5_Litter	F0_Dams	10	49.21
81	27	M_HE	10_Litter	F0_Dams	10	52.46
82	1	M_LE	10_Litter	F0_Dams	14	42.26
83	2	M_LE	5_Litter	F0_Dams	14	45.62
84	3	M_LE	10_Litter	F0_Dams	14	47.26
85	4	M_LE	5_Litter	F0_Dams	14	43.76
86	5	M_HE	5_Litter	F0_Dams	14	45.04
87	6	M_HE	5_Litter	F0_Dams	14	41.56
88	7	M_HE	10_Litter	F0_Dams	14	48.02
89	8	M_HE	10_Litter	F0_Dams	14	45.76
90	9	M_LE	10_Litter	F0_Dams	14	41.23
91	10	M_LE	5_Litter	F0_Dams	14	45.83
92	11	M_LE	5_Litter	F0_Dams	14	44.51
93	12	M_LE	10_Litter	F0_Dams	14	41.86
94	13	M_HE	5_Litter	F0_Dams	14	41.39
95	14	M_HE	10_Litter	F0_Dams	14	43.13
96	15	M_HE	5_Litter	F0_Dams	14	42.62
97	16	M_HE	10_Litter	F0_Dams	14	46.90
98	17	M_LE	5_Litter	F0_Dams	14	47.80
99	18	M_LE	5_Litter	F0_Dams	14	45.03
100	19	M_HE	10_Litter	F0_Dams	14	56.29
101	20	M_HE	5_Litter	F0_Dams	14	46.14
102	21	M_LE	5_Litter	F0_Dams	14	40.03
103	22	M_LE	5_Litter	F0_Dams	14	43.62
104	23	M_LE	5_Litter	F0_Dams	14	50.49
105	24	M_HE	10_Litter	F0_Dams	14	45.49
106	25	M_HE	5_Litter	F0_Dams	14	42.61
107	26	M_HE	5_Litter	F0_Dams	14	39.78
108	27	M_HE	10_Litter	F0_Dams	14	46.02
109	1	M_LE	10_Litter	F0_Dams	18	44.06
110	2	M_LE	5_Litter	F0_Dams	18	43.85
111	3	M_LE	10_Litter	F0_Dams	18	47.31
112	4	M_LE	5_Litter	F0_Dams	18	42.28
113	5	M_HE	5_Litter	F0_Dams	18	39.49
114	6	M_HE	5_Litter	F0_Dams	18	37.12
115	7	M_HE	10_Litter	F0_Dams	18	39.30
116	8	M_HE	10_Litter	F0_Dams	18	43.61
117	9	M_LE	10_Litter	F0_Dams	18	41.78
118	10	M_LE	5_Litter	F0_Dams	18	42.18
119	11	M_LE	5_Litter	F0_Dams	18	37.92
120	12	M_LE	10_Litter	F0_Dams	18	44.67
121	13	M_HE	5_Litter	F0_Dams	18	40.08
122	14	M_HE	10_Litter	F0_Dams	18	45.47
123	15	M_HE	5_Litter	F0_Dams	18	39.93
124	16	M_HE	10_Litter	F0_Dams	18	41.82
125	17	M_LE	5_Litter	F0_Dams	18	40.36
126	18	M_LE	5_Litter	F0_Dams	18	37.69
127	19	M_HE	10_Litter	F0_Dams	18	41.63
128	20	M_HE	5_Litter	F0_Dams	18	41.45
129	21	M_LE	5_Litter	F0_Dams	18	40.72
130	22	M_LE	5_Litter	F0_Dams	18	34.02
131	23	M_LE	5_Litter	F0_Dams	18	43.98
132	24	M_HE	10_Litter	F0_Dams	18	40.52
133	25	M_HE	5_Litter	F0_Dams	18	40.67
134	26	M_HE	5_Litter	F0_Dams	18	36.50
135	27	M_HE	10_Litter	F0_Dams	18	49.79

## Sheet: Fig_2B
Sample	Animal	Maternal_diet	Litter_size	Generation	Day	Weight
1	1	M_LE	10_Litter	F1_Litter	1	21.46
2	2	M_LE	5_Litter	F1_Litter	1	8.64
3	3	M_LE	10_Litter	F1_Litter	1	26.27
4	4	M_LE	5_Litter	F1_Litter	1	2023-01-10
5	5	M_HE	5_Litter	F1_Litter	1	10.57
6	6	M_HE	5_Litter	F1_Litter	1	9.46
7	7	M_HE	10_Litter	F1_Litter	1	20.44
8	8	M_HE	10_Litter	F1_Litter	1	19.53
9	9	M_LE	10_Litter	F1_Litter	1	22.35
10	10	M_LE	5_Litter	F1_Litter	1	11.64
11	11	M_LE	5_Litter	F1_Litter	1	11.93
12	12	M_LE	10_Litter	F1_Litter	1	20.67
13	13	M_HE	5_Litter	F1_Litter	1	11.99
14	14	M_HE	10_Litter	F1_Litter	1	19.50
15	15	M_HE	5_Litter	F1_Litter	1	13.46
16	16	M_HE	10_Litter	F1_Litter	1	22.40
17	17	M_LE	5_Litter	F1_Litter	1	10.67
18	18	M_LE	5_Litter	F1_Litter	1	2023-08-11
19	19	M_HE	10_Litter	F1_Litter	1	2023-02-18
20	20	M_HE	5_Litter	F1_Litter	1	11.29
21	21	M_LE	5_Litter	F1_Litter	1	11.75
22	22	M_LE	5_Litter	F1_Litter	1	9.56
23	23	M_LE	5_Litter	F1_Litter	1	9.26
24	24	M_HE	10_Litter	F1_Litter	1	18.66
25	25	M_HE	5_Litter	F1_Litter	1	9.82
26	26	M_HE	5_Litter	F1_Litter	1	9.99
27	27	M_HE	10_Litter	F1_Litter	1	18.93
28	1	M_LE	10_Litter	F1_Litter	2	23.57
29	2	M_LE	5_Litter	F1_Litter	2	2023-02-10
30	3	M_LE	10_Litter	F1_Litter	2	30.16
31	4	M_LE	5_Litter	F1_Litter	2	11.53
32	5	M_HE	5_Litter	F1_Litter	2	12.20
33	6	M_HE	5_Litter	F1_Litter	2	11.14
34	7	M_HE	10_Litter	F1_Litter	2	24.38
35	8	M_HE	10_Litter	F1_Litter	2	23.25
36	9	M_LE	10_Litter	F1_Litter	2	25.14
37	10	M_LE	5_Litter	F1_Litter	2	14.40
38	11	M_LE	5_Litter	F1_Litter	2	14.42
39	12	M_LE	10_Litter	F1_Litter	2	23.59
40	13	M_HE	5_Litter	F1_Litter	2	14.37
41	14	M_HE	10_Litter	F1_Litter	2	2023-11-21
42	15	M_HE	5_Litter	F1_Litter	2	15.13
43	16	M_HE	10_Litter	F1_Litter	2	25.80
44	17	M_LE	5_Litter	F1_Litter	2	13.80
45	18	M_LE	5_Litter	F1_Litter	2	14.84
46	19	M_HE	10_Litter	F1_Litter	2	22.23
47	20	M_HE	5_Litter	F1_Litter	2	12.56
48	21	M_LE	5_Litter	F1_Litter	2	13.53
49	22	M_LE	5_Litter	F1_Litter	2	12.60
50	23	M_LE	5_Litter	F1_Litter	2	11.82
51	24	M_HE	10_Litter	F1_Litter	2	23.89
52	25	M_HE	5_Litter	F1_Litter	2	12.69
53	26	M_HE	5_Litter	F1_Litter	2	2023-11-13
54	27	M_HE	10_Litter	F1_Litter	2	22.41
55	1	M_LE	10_Litter	F1_Litter	10	56.57
56	2	M_LE	5_Litter	F1_Litter	10	35.16
57	3	M_LE	10_Litter	F1_Litter	10	64.87
58	4	M_LE	5_Litter	F1_Litter	10	38.93
59	5	M_HE	5_Litter	F1_Litter	10	43.62
60	6	M_HE	5_Litter	F1_Litter	10	44.50
61	7	M_HE	10_Litter	F1_Litter	10	76.03
62	8	M_HE	10_Litter	F1_Litter	10	68.15
63	9	M_LE	10_Litter	F1_Litter	10	64.47
64	10	M_LE	5_Litter	F1_Litter	10	45.13
65	11	M_LE	5_Litter	F1_Litter	10	43.30
66	12	M_LE	10_Litter	F1_Litter	10	50.95
67	13	M_HE	5_Litter	F1_Litter	10	49.41
68	14	M_HE	10_Litter	F1_Litter	10	62.89
69	15	M_HE	5_Litter	F1_Litter	10	53.78
70	16	M_HE	10_Litter	F1_Litter	10	80.67
71	17	M_LE	5_Litter	F1_Litter	10	45.94
72	18	M_LE	5_Litter	F1_Litter	10	44.79
73	19	M_HE	10_Litter	F1_Litter	10	76.85
74	20	M_HE	5_Litter	F1_Litter	10	47.52
75	21	M_LE	5_Litter	F1_Litter	10	46.38
76	22	M_LE	5_Litter	F1_Litter	10	47.31
77	23	M_LE	5_Litter	F1_Litter	10	46.58
78	24	M_HE	10_Litter	F1_Litter	10	89.63
79	25	M_HE	5_Litter	F1_Litter	10	56.59
80	26	M_HE	5_Litter	F1_Litter	10	57.74
81	27	M_HE	10_Litter	F1_Litter	10	86.64
82	1	M_LE	10_Litter	F1_Litter	14	70.06
83	2	M_LE	5_Litter	F1_Litter	14	46.86
84	3	M_LE	10_Litter	F1_Litter	14	78.45
85	4	M_LE	5_Litter	F1_Litter	14	53.42
86	5	M_HE	5_Litter	F1_Litter	14	60.97
87	6	M_HE	5_Litter	F1_Litter	14	63.67
88	7	M_HE	10_Litter	F1_Litter	14	100.29
89	8	M_HE	10_Litter	F1_Litter	14	88.07
90	9	M_LE	10_Litter	F1_Litter	14	79.05
91	10	M_LE	5_Litter	F1_Litter	14	58.92
92	11	M_LE	5_Litter	F1_Litter	14	54.84
93	12	M_LE	10_Litter	F1_Litter	14	61.71
94	13	M_HE	5_Litter	F1_Litter	14	66.01
95	14	M_HE	10_Litter	F1_Litter	14	81.66
96	15	M_HE	5_Litter	F1_Litter	14	71.22
97	16	M_HE	10_Litter	F1_Litter	14	100.36
98	17	M_LE	5_Litter	F1_Litter	14	58.97
99	18	M_LE	5_Litter	F1_Litter	14	54.80
100	19	M_HE	10_Litter	F1_Litter	14	107.04
101	20	M_HE	5_Litter	F1_Litter	14	77.78
102	21	M_LE	5_Litter	F1_Litter	14	72.02
103	22	M_LE	5_Litter	F1_Litter	14	57.35
104	23	M_LE	5_Litter	F1_Litter	14	63.06
105	24	M_HE	10_Litter	F1_Litter	14	119.62
106	25	M_HE	5_Litter	F1_Litter	14	78.47
107	26	M_HE	5_Litter	F1_Litter	14	82.54
108	27	M_HE	10_Litter	F1_Litter	14	119.26
109	1	M_LE	10_Litter	F1_Litter	18	90.07
110	2	M_LE	5_Litter	F1_Litter	18	55.56
111	3	M_LE	10_Litter	F1_Litter	18	100.96
112	4	M_LE	5_Litter	F1_Litter	18	60.69
113	5	M_HE	5_Litter	F1_Litter	18	79.03
114	6	M_HE	5_Litter	F1_Litter	18	77.72
115	7	M_HE	10_Litter	F1_Litter	18	120.90
116	8	M_HE	10_Litter	F1_Litter	18	111.46
117	9	M_LE	10_Litter	F1_Litter	18	96.80
118	10	M_LE	5_Litter	F1_Litter	18	68.23
119	11	M_LE	5_Litter	F1_Litter	18	67.44
120	12	M_LE	10_Litter	F1_Litter	18	72.42
121	13	M_HE	5_Litter	F1_Litter	18	84.04
122	14	M_HE	10_Litter	F1_Litter	18	103.94
123	15	M_HE	5_Litter	F1_Litter	18	87.39
124	16	M_HE	10_Litter	F1_Litter	18	124.76
125	17	M_LE	5_Litter	F1_Litter	18	83.77
126	18	M_LE	5_Litter	F1_Litter	18	76.40
127	19	M_HE	10_Litter	F1_Litter	18	138.53
128	20	M_HE	5_Litter	F1_Litter	18	104.99
129	21	M_LE	5_Litter	F1_Litter	18	106.74
130	22	M_LE	5_Litter	F1_Litter	18	91.57
131	23	M_LE	5_Litter	F1_Litter	18	93.90
132	24	M_HE	10_Litter	F1_Litter	18	192.57
133	25	M_HE	5_Litter	F1_Litter	18	111.66
134	26	M_HE	5_Litter	F1_Litter	18	108.83
135	27	M_HE	10_Litter	F1_Litter	18	196.38

## Sheet: Fig_3
Sample	Animal	Maternal_diet	Litter_size	Post_weaning_diet	Generation	Day	Weight
1	1	M_LE	10_Litter	P_LE	F1_males	32	26.56
2	2	M_LE	10_Litter	P_LE	F1_males	32	25.60
3	3	M_LE	10_Litter	P_LE	F1_males	32	26.87
4	4	M_LE	10_Litter	P_LE	F1_males	32	26.46
5	5	M_LE	10_Litter	P_LE	F1_males	32	2023-10-24
6	6	M_LE	10_Litter	P_LE	F1_males	32	24.61
7	7	M_HE	10_Litter	P_LE	F1_males	32	27.20
8	8	M_HE	10_Litter	P_LE	F1_males	32	26.84
9	9	M_HE	10_Litter	P_LE	F1_males	32	26.71
10	10	M_HE	10_Litter	P_LE	F1_males	32	29.89
11	11	M_HE	10_Litter	P_LE	F1_males	32	34.01
12	12	M_HE	10_Litter	P_LE	F1_males	32	31.58
13	13	M_LE	5_Litter	P_LE	F1_males	32	31.06
14	14	M_LE	5_Litter	P_LE	F1_males	32	30.55
15	15	M_LE	5_Litter	P_LE	F1_males	32	31.04
16	16	M_LE	5_Litter	P_LE	F1_males	32	32.89
17	17	M_LE	5_Litter	P_LE	F1_males	32	32.02
18	18	M_LE	5_Litter	P_LE	F1_males	32	34.01
19	19	M_HE	5_Litter	P_LE	F1_males	32	28.96
20	20	M_HE	5_Litter	P_LE	F1_males	32	25.75
21	21	M_HE	5_Litter	P_LE	F1_males	32	2023-06-28
22	22	M_HE	5_Litter	P_LE	F1_males	32	26.77
23	23	M_HE	5_Litter	P_LE	F1_males	32	31.52
24	24	M_HE	5_Litter	P_LE	F1_males	32	29.79
25	25	M_HE	5_Litter	P_HE	F1_males	32	33.68
26	26	M_HE	5_Litter	P_HE	F1_males	32	34.14
27	27	M_HE	5_Litter	P_HE	F1_males	32	31.57
28	28	M_HE	5_Litter	P_HE	F1_males	32	33.08
29	29	M_HE	5_Litter	P_HE	F1_males	32	32.60
30	30	M_HE	5_Litter	P_HE	F1_males	32	33.45
31	31	M_LE	5_Litter	P_HE	F1_males	32	32.53
32	32	M_LE	5_Litter	P_HE	F1_males	32	31.70
33	33	M_LE	5_Litter	P_HE	F1_males	32	33.91
34	34	M_LE	5_Litter	P_HE	F1_males	32	2023-10-29
35	35	M_LE	5_Litter	P_HE	F1_males	32	28.85
36	36	M_HE	10_Litter	P_HE	F1_males	32	30.28
37	37	M_HE	10_Litter	P_HE	F1_males	32	28.40
38	38	M_HE	10_Litter	P_HE	F1_males	32	28.19
39	39	M_HE	10_Litter	P_HE	F1_males	32	27.56
40	40	M_HE	10_Litter	P_HE	F1_males	32	28.95
41	41	M_HE	10_Litter	P_HE	F1_males	32	24.34
42	42	M_LE	10_Litter	P_HE	F1_males	32	31.52
43	43	M_LE	10_Litter	P_HE	F1_males	32	31.27
44	44	M_LE	10_Litter	P_HE	F1_males	32	32.43
45	45	M_LE	10_Litter	P_HE	F1_males	32	31.69
46	46	M_LE	10_Litter	P_HE	F1_males	32	26.84
47	47	M_LE	10_Litter	P_HE	F1_males	32	29.68
48	1	M_LE	10_Litter	P_LE	F1_males	46	34.31
49	2	M_LE	10_Litter	P_LE	F1_males	46	33.23
50	3	M_LE	10_Litter	P_LE	F1_males	46	35.21
51	4	M_LE	10_Litter	P_LE	F1_males	46	36.20
52	5	M_LE	10_Litter	P_LE	F1_males	46	32.50
53	6	M_LE	10_Litter	P_LE	F1_males	46	33.95
54	7	M_HE	10_Litter	P_LE	F1_males	46	30.51
55	8	M_HE	10_Litter	P_LE	F1_males	46	32.16
56	9	M_HE	10_Litter	P_LE	F1_males	46	32.51
57	10	M_HE	10_Litter	P_LE	F1_males	46	35.05
58	11	M_HE	10_Litter	P_LE	F1_males	46	39.26
59	12	M_HE	10_Litter	P_LE	F1_males	46	38.14
60	13	M_LE	5_Litter	P_LE	F1_males	46	36.12
61	14	M_LE	5_Litter	P_LE	F1_males	46	38.73
62	15	M_LE	5_Litter	P_LE	F1_males	46	38.77
63	16	M_LE	5_Litter	P_LE	F1_males	46	36.34
64	17	M_LE	5_Litter	P_LE	F1_males	46	37.86
65	18	M_LE	5_Litter	P_LE	F1_males	46	38.19
66	19	M_HE	5_Litter	P_LE	F1_males	46	35.63
67	20	M_HE	5_Litter	P_LE	F1_males	46	33.61
68	21	M_HE	5_Litter	P_LE	F1_males	46	33.76
69	22	M_HE	5_Litter	P_LE	F1_males	46	31.65
70	23	M_HE	5_Litter	P_LE	F1_males	46	38.79
71	24	M_HE	5_Litter	P_LE	F1_males	46	36.67
72	25	M_HE	5_Litter	P_HE	F1_males	46	39.57
73	26	M_HE	5_Litter	P_HE	F1_males	46	39.64
74	27	M_HE	5_Litter	P_HE	F1_males	46	38.71
75	28	M_HE	5_Litter	P_HE	F1_males	46	43.45
76	29	M_HE	5_Litter	P_HE	F1_males	46	42.60
77	30	M_HE	5_Litter	P_HE	F1_males	46	44.12
78	31	M_LE	5_Litter	P_HE	F1_males	46	43.21
79	32	M_LE	5_Litter	P_HE	F1_males	46	45.89
80	33	M_LE	5_Litter	P_HE	F1_males	46	38.48
81	34	M_LE	5_Litter	P_HE	F1_males	46	37.28
82	35	M_LE	5_Litter	P_HE	F1_males	46	38.45
83	36	M_HE	10_Litter	P_HE	F1_males	46	39.70
84	37	M_HE	10_Litter	P_HE	F1_males	46	41.09
85	38	M_HE	10_Litter	P_HE	F1_males	46	39.08
86	39	M_HE	10_Litter	P_HE	F1_males	46	39.82
87	40	M_HE	10_Litter	P_HE	F1_males	46	36.78
88	41	M_HE	10_Litter	P_HE	F1_males	46	34.30
89	42	M_LE	10_Litter	P_HE	F1_males	46	48.01
90	43	M_LE	10_Litter	P_HE	F1_males	46	39.76
91	44	M_LE	10_Litter	P_HE	F1_males	46	43.48
92	45	M_LE	10_Litter	P_HE	F1_males	46	37.41
93	46	M_LE	10_Litter	P_HE	F1_males	46	31.14
94	47	M_LE	10_Litter	P_HE	F1_males	46	34.51
95	1	M_LE	10_Litter	P_LE	F1_males	60	34.39
96	2	M_LE	10_Litter	P_LE	F1_males	60	36.14
97	3	M_LE	10_Litter	P_LE	F1_males	60	37.24
98	4	M_LE	10_Litter	P_LE	F1_males	60	36.91
99	5	M_LE	10_Litter	P_LE	F1_males	60	34.76
100	6	M_LE	10_Litter	P_LE	F1_males	60	36.65
101	7	M_HE	10_Litter	P_LE	F1_males	60	31.41
102	8	M_HE	10_Litter	P_LE	F1_males	60	33.20
103	9	M_HE	10_Litter	P_LE	F1_males	60	33.95
104	10	M_HE	10_Litter	P_LE	F1_males	60	35.44
105	11	M_HE	10_Litter	P_LE	F1_males	60	39.31
106	12	M_HE	10_Litter	P_LE	F1_males	60	41.63
107	13	M_LE	5_Litter	P_LE	F1_males	60	39.16
108	14	M_LE	5_Litter	P_LE	F1_males	60	39.30
109	15	M_LE	5_Litter	P_LE	F1_males	60	40.97
110	16	M_LE	5_Litter	P_LE	F1_males	60	38.40
111	17	M_LE	5_Litter	P_LE	F1_males	60	41.26
112	18	M_LE	5_Litter	P_LE	F1_males	60	40.92
113	19	M_HE	5_Litter	P_LE	F1_males	60	38.95
114	20	M_HE	5_Litter	P_LE	F1_males	60	37.56
115	21	M_HE	5_Litter	P_LE	F1_males	60	38.21
116	22	M_HE	5_Litter	P_LE	F1_males	60	34.67
117	23	M_HE	5_Litter	P_LE	F1_males	60	40.43
118	24	M_HE	5_Litter	P_LE	F1_males	60	41.35
119	25	M_HE	5_Litter	P_HE	F1_males	60	42.48
120	26	M_HE	5_Litter	P_HE	F1_males	60	44.27
121	27	M_HE	5_Litter	P_HE	F1_males	60	40.94
122	28	M_HE	5_Litter	P_HE	F1_males	60	52.24
123	29	M_HE	5_Litter	P_HE	F1_males	60	43.55
124	30	M_HE	5_Litter	P_HE	F1_males	60	48.90
125	31	M_LE	5_Litter	P_HE	F1_males	60	41.99
126	32	M_LE	5_Litter	P_HE	F1_males	60	45.28
127	33	M_LE	5_Litter	P_HE	F1_males	60	40.32
128	34	M_LE	5_Litter	P_HE	F1_males	60	39.95
129	35	M_LE	5_Litter	P_HE	F1_males	60	40.61
130	36	M_HE	10_Litter	P_HE	F1_males	60	44.49
131	37	M_HE	10_Litter	P_HE	F1_males	60	43.08
132	38	M_HE	10_Litter	P_HE	F1_males	60	40.02
133	39	M_HE	10_Litter	P_HE	F1_males	60	41.68
134	40	M_HE	10_Litter	P_HE	F1_males	60	40.28
135	41	M_HE	10_Litter	P_HE	F1_males	60	41.43
136	42	M_LE	10_Litter	P_HE	F1_males	60	50.97
137	43	M_LE	10_Litter	P_HE	F1_males	60	41.80
138	44	M_LE	10_Litter	P_HE	F1_males	60	44.38
139	45	M_LE	10_Litter	P_HE	F1_males	60	41.71
140	46	M_LE	10_Litter	P_HE	F1_males	60	35.56
141	47	M_LE	10_Litter	P_HE	F1_males	60	37.85
142	1	M_LE	10_Litter	P_LE	F1_males	74	36.87
143	2	M_LE	10_Litter	P_LE	F1_males	74	38.68
144	3	M_LE	10_Litter	P_LE	F1_males	74	40.09
145	4	M_LE	10_Litter	P_LE	F1_males	74	39.30
146	5	M_LE	10_Litter	P_LE	F1_males	74	27.99
147	6	M_LE	10_Litter	P_LE	F1_males	74	38.75
148	7	M_HE	10_Litter	P_LE	F1_males	74	37.60
149	8	M_HE	10_Litter	P_LE	F1_males	74	36.47
150	9	M_HE	10_Litter	P_LE	F1_males	74	38.50
151	10	M_HE	10_Litter	P_LE	F1_males	74	40.06
152	11	M_HE	10_Litter	P_LE	F1_males	74	40.18
153	12	M_HE	10_Litter	P_LE	F1_males	74	42.97
154	13	M_LE	5_Litter	P_LE	F1_males	74	41.85
155	14	M_LE	5_Litter	P_LE	F1_males	74	43.53
156	15	M_LE	5_Litter	P_LE	F1_males	74	44.38
157	16	M_LE	5_Litter	P_LE	F1_males	74	42.06
158	17	M_LE	5_Litter	P_LE	F1_males	74	38.65
159	18	M_LE	5_Litter	P_LE	F1_males	74	40.68
160	19	M_HE	5_Litter	P_LE	F1_males	74	31.16
161	20	M_HE	5_Litter	P_LE	F1_males	74	41.64
162	21	M_HE	5_Litter	P_LE	F1_males	74	36.98
163	22	M_HE	5_Litter	P_LE	F1_males	74	37.30
164	23	M_HE	5_Litter	P_LE	F1_males	74	44.45
165	24	M_HE	5_Litter	P_LE	F1_males	74	43.13
166	25	M_HE	5_Litter	P_HE	F1_males	74	48.13
167	26	M_HE	5_Litter	P_HE	F1_males	74	44.77
168	27	M_HE	5_Litter	P_HE	F1_males	74	41.17
169	28	M_HE	5_Litter	P_HE	F1_males	74	56.89
170	29	M_HE	5_Litter	P_HE	F1_males	74	46.77
171	30	M_HE	5_Litter	P_HE	F1_males	74	53.16
172	31	M_LE	5_Litter	P_HE	F1_males	74	48.24
173	32	M_LE	5_Litter	P_HE	F1_males	74	45.67
174	33	M_LE	5_Litter	P_HE	F1_males	74	43.30
175	34	M_LE	5_Litter	P_HE	F1_males	74	44.12
176	35	M_LE	5_Litter	P_HE	F1_males	74	43.49
177	36	M_HE	10_Litter	P_HE	F1_males	74	48.84
178	37	M_HE	10_Litter	P_HE	F1_males	74	49.64
179	38	M_HE	10_Litter	P_HE	F1_males	74	48.16
180	39	M_HE	10_Litter	P_HE	F1_males	74	45.81
181	40	M_HE	10_Litter	P_HE	F1_males	74	40.97
182	41	M_HE	10_Litter	P_HE	F1_males	74	39.50
183	42	M_LE	10_Litter	P_HE	F1_males	74	47.05
184	43	M_LE	10_Litter	P_HE	F1_males	74	43.97
185	44	M_LE	10_Litter	P_HE	F1_males	74	37.52
186	45	M_LE	10_Litter	P_HE	F1_males	74	46.07
187	46	M_LE	10_Litter	P_HE	F1_males	74	35.80
188	47	M_LE	10_Litter	P_HE	F1_males	74	46.18

## Sheet: FIg_4
Sample	Animal	Maternal_diet	Litter_size	Post_weaning_diet	Generation	Day	Weight
1	1	M_LE	10_Litter	P_LE	F1_Dams	32	25.53
2	2	M_LE	10_Litter	P_LE	F1_Dams	32	2023-06-25
3	3	M_LE	10_Litter	P_LE	F1_Dams	32	22.66
4	4	M_LE	10_Litter	P_LE	F1_Dams	32	23.93
5	5	M_LE	10_Litter	P_LE	F1_Dams	32	22.93
6	6	M_LE	10_Litter	P_LE	F1_Dams	32	21.68
7	7	M_HE	10_Litter	P_LE	F1_Dams	32	23.37
8	8	M_HE	10_Litter	P_LE	F1_Dams	32	24.83
9	9	M_HE	10_Litter	P_LE	F1_Dams	32	22.75
10	10	M_HE	10_Litter	P_LE	F1_Dams	32	22.63
11	11	M_HE	10_Litter	P_LE	F1_Dams	32	21.94
12	12	M_HE	10_Litter	P_LE	F1_Dams	32	20.35
13	13	M_LE	5_Litter	P_LE	F1_Dams	32	24.68
14	14	M_LE	5_Litter	P_LE	F1_Dams	32	25.60
15	15	M_LE	5_Litter	P_LE	F1_Dams	32	25.72
16	16	M_LE	5_Litter	P_LE	F1_Dams	32	25.76
17	17	M_LE	5_Litter	P_LE	F1_Dams	32	29.17
18	18	M_LE	5_Litter	P_LE	F1_Dams	32	27.88
19	19	M_HE	5_Litter	P_LE	F1_Dams	32	2023-12-26
20	20	M_HE	5_Litter	P_LE	F1_Dams	32	22.81
21	21	M_HE	5_Litter	P_LE	F1_Dams	32	22.21
22	22	M_HE	5_Litter	P_HE	F1_Dams	32	2023-07-30
23	23	M_HE	5_Litter	P_HE	F1_Dams	32	28.46
24	24	M_HE	5_Litter	P_HE	F1_Dams	32	2023-10-30
25	25	M_HE	5_Litter	P_HE	F1_Dams	32	32.19
26	26	M_HE	5_Litter	P_HE	F1_Dams	32	28.32
27	27	M_HE	5_Litter	P_HE	F1_Dams	32	2023-07-30
28	28	M_HE	5_Litter	P_HE	F1_Dams	32	32.06
29	29	M_LE	5_Litter	P_HE	F1_Dams	32	25.61
30	30	M_LE	5_Litter	P_HE	F1_Dams	32	29.63
31	31	M_LE	5_Litter	P_HE	F1_Dams	32	25.87
32	32	M_LE	5_Litter	P_HE	F1_Dams	32	24.88
33	33	M_LE	5_Litter	P_HE	F1_Dams	32	24.57
34	34	M_HE	10_Litter	P_HE	F1_Dams	32	27.19
35	35	M_HE	10_Litter	P_HE	F1_Dams	32	28.57
36	36	M_HE	10_Litter	P_HE	F1_Dams	32	27.60
37	37	M_HE	10_Litter	P_HE	F1_Dams	32	27.94
38	38	M_HE	10_Litter	P_HE	F1_Dams	32	2023-08-29
39	39	M_HE	10_Litter	P_HE	F1_Dams	32	27.96
40	40	M_HE	10_Litter	P_HE	F1_Dams	32	2023-06-24
41	41	M_LE	10_Litter	P_HE	F1_Dams	32	26.79
42	42	M_LE	10_Litter	P_HE	F1_Dams	32	28.60
43	43	M_LE	10_Litter	P_HE	F1_Dams	32	23.69
44	44	M_LE	10_Litter	P_HE	F1_Dams	32	24.76
45	45	M_LE	10_Litter	P_HE	F1_Dams	32	25.79
46	1	M_LE	10_Litter	P_LE	F1_Dams	46	29.19
47	2	M_LE	10_Litter	P_LE	F1_Dams	46	28.92
48	3	M_LE	10_Litter	P_LE	F1_Dams	46	25.68
49	4	M_LE	10_Litter	P_LE	F1_Dams	46	26.70
50	5	M_LE	10_Litter	P_LE	F1_Dams	46	2023-10-25
51	6	M_LE	10_Litter	P_LE	F1_Dams	46	26.94
52	7	M_HE	10_Litter	P_LE	F1_Dams	46	30.84
53	8	M_HE	10_Litter	P_LE	F1_Dams	46	28.57
54	9	M_HE	10_Litter	P_LE	F1_Dams	46	26.32
55	10	M_HE	10_Litter	P_LE	F1_Dams	46	27.70
56	11	M_HE	10_Litter	P_LE	F1_Dams	46	24.95
57	12	M_HE	10_Litter	P_LE	F1_Dams	46	27.65
58	13	M_LE	5_Litter	P_LE	F1_Dams	46	28.86
59	14	M_LE	5_Litter	P_LE	F1_Dams	46	31.56
60	15	M_LE	5_Litter	P_LE	F1_Dams	46	27.77
61	16	M_LE	5_Litter	P_LE	F1_Dams	46	29.82
62	17	M_LE	5_Litter	P_LE	F1_Dams	46	28.37
63	18	M_LE	5_Litter	P_LE	F1_Dams	46	31.30
64	19	M_HE	5_Litter	P_LE	F1_Dams	46	29.50
65	20	M_HE	5_Litter	P_LE	F1_Dams	46	26.48
66	21	M_HE	5_Litter	P_LE	F1_Dams	46	2023-08-27
67	22	M_HE	5_Litter	P_HE	F1_Dams	46	33.99
68	23	M_HE	5_Litter	P_HE	F1_Dams	46	37.70
69	24	M_HE	5_Litter	P_HE	F1_Dams	46	36.12
70	25	M_HE	5_Litter	P_HE	F1_Dams	46	46.54
71	26	M_HE	5_Litter	P_HE	F1_Dams	46	31.68
72	27	M_HE	5_Litter	P_HE	F1_Dams	46	39.18
73	28	M_HE	5_Litter	P_HE	F1_Dams	46	43.05
74	29	M_LE	5_Litter	P_HE	F1_Dams	46	26.57
75	30	M_LE	5_Litter	P_HE	F1_Dams	46	33.67
76	31	M_LE	5_Litter	P_HE	F1_Dams	46	30.63
77	32	M_LE	5_Litter	P_HE	F1_Dams	46	29.35
78	33	M_LE	5_Litter	P_HE	F1_Dams	46	28.83
79	34	M_HE	10_Litter	P_HE	F1_Dams	46	34.02
80	35	M_HE	10_Litter	P_HE	F1_Dams	46	30.94
81	36	M_HE	10_Litter	P_HE	F1_Dams	46	32.10
82	37	M_HE	10_Litter	P_HE	F1_Dams	46	34.71
83	38	M_HE	10_Litter	P_HE	F1_Dams	46	32.96
84	39	M_HE	10_Litter	P_HE	F1_Dams	46	33.20
85	40	M_HE	10_Litter	P_HE	F1_Dams	46	30.96
86	41	M_LE	10_Litter	P_HE	F1_Dams	46	32.16
87	42	M_LE	10_Litter	P_HE	F1_Dams	46	33.42
88	43	M_LE	10_Litter	P_HE	F1_Dams	46	27.29
89	44	M_LE	10_Litter	P_HE	F1_Dams	46	2023-12-31
90	45	M_LE	10_Litter	P_HE	F1_Dams	46	31.93
91	1	M_LE	10_Litter	P_LE	F1_Dams	60	2023-01-30
92	2	M_LE	10_Litter	P_LE	F1_Dams	60	30.76
93	3	M_LE	10_Litter	P_LE	F1_Dams	60	29.30
94	4	M_LE	10_Litter	P_LE	F1_Dams	60	29.62
95	5	M_LE	10_Litter	P_LE	F1_Dams	60	2023-09-29
96	6	M_LE	10_Litter	P_LE	F1_Dams	60	28.53
97	7	M_HE	10_Litter	P_LE	F1_Dams	60	30.97
98	8	M_HE	10_Litter	P_LE	F1_Dams	60	31.09
99	9	M_HE	10_Litter	P_LE	F1_Dams	60	27.33
100	10	M_HE	10_Litter	P_LE	F1_Dams	60	29.84
101	11	M_HE	10_Litter	P_LE	F1_Dams	60	29.72
102	12	M_HE	10_Litter	P_LE	F1_Dams	60	27.61
103	13	M_LE	5_Litter	P_LE	F1_Dams	60	31.80
104	14	M_LE	5_Litter	P_LE	F1_Dams	60	31.26
105	15	M_LE	5_Litter	P_LE	F1_Dams	60	31.22
106	16	M_LE	5_Litter	P_LE	F1_Dams	60	31.53
107	17	M_LE	5_Litter	P_LE	F1_Dams	60	31.29
108	18	M_LE	5_Litter	P_LE	F1_Dams	60	34.18
109	19	M_HE	5_Litter	P_LE	F1_Dams	60	31.55
110	20	M_HE	5_Litter	P_LE	F1_Dams	60	29.60
111	21	M_HE	5_Litter	P_LE	F1_Dams	60	29.36
112	22	M_HE	5_Litter	P_HE	F1_Dams	60	41.69
113	23	M_HE	5_Litter	P_HE	F1_Dams	60	52.15
114	24	M_HE	5_Litter	P_HE	F1_Dams	60	43.61
115	25	M_HE	5_Litter	P_HE	F1_Dams	60	61.40
116	26	M_HE	5_Litter	P_HE	F1_Dams	60	37.02
117	27	M_HE	5_Litter	P_HE	F1_Dams	60	52.94
118	28	M_HE	5_Litter	P_HE	F1_Dams	60	51.02
119	29	M_LE	5_Litter	P_HE	F1_Dams	60	32.92
120	30	M_LE	5_Litter	P_HE	F1_Dams	60	39.33
121	31	M_LE	5_Litter	P_HE	F1_Dams	60	34.50
122	32	M_LE	5_Litter	P_HE	F1_Dams	60	31.90
123	33	M_LE	5_Litter	P_HE	F1_Dams	60	35.62
124	34	M_HE	10_Litter	P_HE	F1_Dams	60	40.32
125	35	M_HE	10_Litter	P_HE	F1_Dams	60	35.09
126	36	M_HE	10_Litter	P_HE	F1_Dams	60	38.02
127	37	M_HE	10_Litter	P_HE	F1_Dams	60	44.19
128	38	M_HE	10_Litter	P_HE	F1_Dams	60	40.91
129	39	M_HE	10_Litter	P_HE	F1_Dams	60	37.63
130	40	M_HE	10_Litter	P_HE	F1_Dams	60	38.64
131	41	M_LE	10_Litter	P_HE	F1_Dams	60	36.50
132	42	M_LE	10_Litter	P_HE	F1_Dams	60	41.78
133	43	M_LE	10_Litter	P_HE	F1_Dams	60	34.96
134	44	M_LE	10_Litter	P_HE	F1_Dams	60	39.94
135	45	M_LE	10_Litter	P_HE	F1_Dams	60	33.84
136	1	M_LE	10_Litter	P_LE	F1_Dams	74	33.70
137	2	M_LE	10_Litter	P_LE	F1_Dams	74	29.82
138	3	M_LE	10_Litter	P_LE	F1_Dams	74	32.09
139	4	M_LE	10_Litter	P_LE	F1_Dams	74	31.72
140	5	M_LE	10_Litter	P_LE	F1_Dams	74	31.04
141	6	M_LE	10_Litter	P_LE	F1_Dams	74	31.63
142	7	M_HE	10_Litter	P_LE	F1_Dams	74	32.86
143	8	M_HE	10_Litter	P_LE	F1_Dams	74	31.36
144	9	M_HE	10_Litter	P_LE	F1_Dams	74	29.41
145	10	M_HE	10_Litter	P_LE	F1_Dams	74	31.72
146	11	M_HE	10_Litter	P_LE	F1_Dams	74	32.24
147	12	M_HE	10_Litter	P_LE	F1_Dams	74	29.14
148	13	M_LE	5_Litter	P_LE	F1_Dams	74	33.18
149	14	M_LE	5_Litter	P_LE	F1_Dams	74	32.82
150	15	M_LE	5_Litter	P_LE	F1_Dams	74	34.06
151	16	M_LE	5_Litter	P_LE	F1_Dams	74	33.40
152	17	M_LE	5_Litter	P_LE	F1_Dams	74	36.95
153	18	M_LE	5_Litter	P_LE	F1_Dams	74	37.10
154	19	M_HE	5_Litter	P_LE	F1_Dams	74	32.95
155	20	M_HE	5_Litter	P_LE	F1_Dams	74	32.02
156	21	M_HE	5_Litter	P_LE	F1_Dams	74	28.86
157	22	M_HE	5_Litter	P_HE	F1_Dams	74	48.05
158	23	M_HE	5_Litter	P_HE	F1_Dams	74	56.67
159	24	M_HE	5_Litter	P_HE	F1_Dams	74	45.19
160	25	M_HE	5_Litter	P_HE	F1_Dams	74	63.04
161	26	M_HE	5_Litter	P_HE	F1_Dams	74	41.73
162	27	M_HE	5_Litter	P_HE	F1_Dams	74	65.13
163	28	M_HE	5_Litter	P_HE	F1_Dams	74	68.80
164	29	M_LE	5_Litter	P_HE	F1_Dams	74	33.47
165	30	M_LE	5_Litter	P_HE	F1_Dams	74	40.08
166	31	M_LE	5_Litter	P_HE	F1_Dams	74	38.80
167	32	M_LE	5_Litter	P_HE	F1_Dams	74	47.63
168	33	M_LE	5_Litter	P_HE	F1_Dams	74	39.67
169	34	M_HE	10_Litter	P_HE	F1_Dams	74	42.70
170	35	M_HE	10_Litter	P_HE	F1_Dams	74	45.12
171	36	M_HE	10_Litter	P_HE	F1_Dams	74	42.68
172	37	M_HE	10_Litter	P_HE	F1_Dams	74	52.13
173	38	M_HE	10_Litter	P_HE	F1_Dams	74	55.24
174	39	M_HE	10_Litter	P_HE	F1_Dams	74	39.02
175	40	M_HE	10_Litter	P_HE	F1_Dams	74	46.06
176	41	M_LE	10_Litter	P_HE	F1_Dams	74	39.86
177	42	M_LE	10_Litter	P_HE	F1_Dams	74	53.98
178	43	M_LE	10_Litter	P_HE	F1_Dams	74	45.72
179	44	M_LE	10_Litter	P_HE	F1_Dams	74	45.39
180	45	M_LE	10_Litter	P_HE	F1_Dams	74	37.15

## Sheet: FIg_5A
Sample	Animal	Maternal_diet	Litter_size	Post_weaning_diet	Generation	Day	Weight	5.0	6.0
1	1	M_LE	10_Litter	P_LE	F1_Dams	1	44.55	NA	NA
2	2	M_LE	10_Litter	P_LE	F1_Dams	1	42.96	NA	NA
3	3	M_LE	10_Litter	P_LE	F1_Dams	1	44.00	NA	NA
4	4	M_LE	10_Litter	P_LE	F1_Dams	1	40.84	NA	NA
5	5	M_LE	10_Litter	P_LE	F1_Dams	1	38.21	NA	NA
6	6	M_LE	10_Litter	P_LE	F1_Dams	1	41.27	NA	NA
7	7	M_HE	10_Litter	P_LE	F1_Dams	1	41.33	NA	NA
8	8	M_HE	10_Litter	P_LE	F1_Dams	1	42.68	NA	NA
9	9	M_HE	10_Litter	P_LE	F1_Dams	1	38.20	NA	NA
10	10	M_HE	10_Litter	P_LE	F1_Dams	1	45.13	NA	NA
11	11	M_HE	10_Litter	P_LE	F1_Dams	1	39.85	NA	NA
12	12	M_HE	10_Litter	P_LE	F1_Dams	1	41.60	NA	NA
13	13	M_LE	5_Litter	P_LE	F1_Dams	1	42.50	NA	NA
14	14	M_LE	5_Litter	P_LE	F1_Dams	1	45.43	NA	NA
15	15	M_LE	5_Litter	P_LE	F1_Dams	1	43.46	NA	NA
16	16	M_LE	5_Litter	P_LE	F1_Dams	1	42.91	NA	NA
17	17	M_LE	5_Litter	P_LE	F1_Dams	1	43.03	NA	NA
18	18	M_LE	5_Litter	P_LE	F1_Dams	1	53.12	NA	NA
19	19	M_HE	5_Litter	P_LE	F1_Dams	1	45.26	NA	NA
20	20	M_HE	5_Litter	P_LE	F1_Dams	1	40.31	NA	NA
21	21	M_HE	5_Litter	P_LE	F1_Dams	1	40.32	NA	NA
22	22	M_HE	5_Litter	P_HE	F1_Dams	1	57.67	NA	NA
23	23	M_HE	5_Litter	P_HE	F1_Dams	1	62.98	NA	NA
24	24	M_HE	5_Litter	P_HE	F1_Dams	1	55.81	NA	NA
25	25	M_HE	5_Litter	P_HE	F1_Dams	1	73.02	NA	NA
26	26	M_HE	5_Litter	P_HE	F1_Dams	1	55.12	NA	NA
27	27	M_HE	5_Litter	P_HE	F1_Dams	1	79.13	NA	NA
28	28	M_HE	5_Litter	P_HE	F1_Dams	1	78.48	NA	NA
29	29	M_LE	5_Litter	P_HE	F1_Dams	1	44.68	NA	NA
30	30	M_LE	5_Litter	P_HE	F1_Dams	1	51.65	NA	NA
31	31	M_LE	5_Litter	P_HE	F1_Dams	1	46.43	NA	NA
32	32	M_LE	5_Litter	P_HE	F1_Dams	1	51.00	NA	NA
33	33	M_LE	5_Litter	P_HE	F1_Dams	1	51.12	NA	NA
34	34	M_HE	10_Litter	P_HE	F1_Dams	1	53.68	NA	NA
35	35	M_HE	10_Litter	P_HE	F1_Dams	1	57.69	NA	NA
36	36	M_HE	10_Litter	P_HE	F1_Dams	1	43.61	NA	NA
37	37	M_HE	10_Litter	P_HE	F1_Dams	1	64.24	NA	NA
38	38	M_HE	10_Litter	P_HE	F1_Dams	1	57.00	NA	NA
39	39	M_HE	10_Litter	P_HE	F1_Dams	1	51.44	NA	NA
40	40	M_HE	10_Litter	P_HE	F1_Dams	1	54.50	NA	NA
41	41	M_LE	10_Litter	P_HE	F1_Dams	1	56.83	NA	NA
42	42	M_LE	10_Litter	P_HE	F1_Dams	1	65.62	NA	NA
43	43	M_LE	10_Litter	P_HE	F1_Dams	1	43.56	NA	NA
44	44	M_LE	10_Litter	P_HE	F1_Dams	1	52.58	NA	NA
45	45	M_LE	10_Litter	P_HE	F1_Dams	1	53.75	NA	NA
46	1	M_LE	10_Litter	P_LE	F1_Dams	2	44.82	NA	NA
47	2	M_LE	10_Litter	P_LE	F1_Dams	2	40.06	NA	NA
48	3	M_LE	10_Litter	P_LE	F1_Dams	2	42.21	NA	NA
49	4	M_LE	10_Litter	P_LE	F1_Dams	2	41.86	NA	NA
50	5	M_LE	10_Litter	P_LE	F1_Dams	2	40.36	NA	NA
51	6	M_LE	10_Litter	P_LE	F1_Dams	2	42.43	NA	NA
52	7	M_HE	10_Litter	P_LE	F1_Dams	2	40.06	NA	NA
53	8	M_HE	10_Litter	P_LE	F1_Dams	2	45.23	NA	NA
54	9	M_HE	10_Litter	P_LE	F1_Dams	2	42.51	NA	NA
55	10	M_HE	10_Litter	P_LE	F1_Dams	2	40.35	NA	NA
56	11	M_HE	10_Litter	P_LE	F1_Dams	2	41.55	NA	NA
57	12	M_HE	10_Litter	P_LE	F1_Dams	2	41.23	NA	NA
58	13	M_LE	5_Litter	P_LE	F1_Dams	2	42.60	NA	NA
59	14	M_LE	5_Litter	P_LE	F1_Dams	2	42.68	NA	NA
60	15	M_LE	5_Litter	P_LE	F1_Dams	2	41.45	NA	NA
61	16	M_LE	5_Litter	P_LE	F1_Dams	2	42.33	NA	NA
62	17	M_LE	5_Litter	P_LE	F1_Dams	2	43.57	NA	NA
63	18	M_LE	5_Litter	P_LE	F1_Dams	2	54.76	NA	NA
64	19	M_HE	5_Litter	P_LE	F1_Dams	2	47.19	NA	NA
65	20	M_HE	5_Litter	P_LE	F1_Dams	2	43.97	NA	NA
66	21	M_HE	5_Litter	P_LE	F1_Dams	2	39.57	NA	NA
67	22	M_HE	5_Litter	P_HE	F1_Dams	2	56.80	NA	NA
68	23	M_HE	5_Litter	P_HE	F1_Dams	2	60.51	NA	NA
69	24	M_HE	5_Litter	P_HE	F1_Dams	2	53.18	NA	NA
70	25	M_HE	5_Litter	P_HE	F1_Dams	2	72.58	NA	NA
71	26	M_HE	5_Litter	P_HE	F1_Dams	2	49.58	NA	NA
72	27	M_HE	5_Litter	P_HE	F1_Dams	2	79.54	NA	NA
73	28	M_HE	5_Litter	P_HE	F1_Dams	2	73.86	NA	NA
74	29	M_LE	5_Litter	P_HE	F1_Dams	2	43.19	NA	NA
75	30	M_LE	5_Litter	P_HE	F1_Dams	2	52.94	NA	NA
76	31	M_LE	5_Litter	P_HE	F1_Dams	2	47.51	NA	NA
77	32	M_LE	5_Litter	P_HE	F1_Dams	2	48.43	NA	NA
78	33	M_LE	5_Litter	P_HE	F1_Dams	2	45.51	NA	NA
79	34	M_HE	10_Litter	P_HE	F1_Dams	2	47.74	NA	NA
80	35	M_HE	10_Litter	P_HE	F1_Dams	2	59.70	NA	NA
81	36	M_HE	10_Litter	P_HE	F1_Dams	2	40.80	NA	NA
82	37	M_HE	10_Litter	P_HE	F1_Dams	2	58.47	NA	NA
83	38	M_HE	10_Litter	P_HE	F1_Dams	2	56.36	NA	NA
84	39	M_HE	10_Litter	P_HE	F1_Dams	2	46.78	NA	NA
85	40	M_HE	10_Litter	P_HE	F1_Dams	2	52.00	NA	NA
86	41	M_LE	10_Litter	P_HE	F1_Dams	2	48.06	NA	NA
87	42	M_LE	10_Litter	P_HE	F1_Dams	2	66.29	NA	NA
88	43	M_LE	10_Litter	P_HE	F1_Dams	2	43.22	NA	NA
89	44	M_LE	10_Litter	P_HE	F1_Dams	2	51.24	NA	NA
90	45	M_LE	10_Litter	P_HE	F1_Dams	2	49.24	NA	NA
91	1	M_LE	10_Litter	P_LE	F1_Dams	10	48.60	NA	NA
92	2	M_LE	10_Litter	P_LE	F1_Dams	10	46.78	NA	NA
93	3	M_LE	10_Litter	P_LE	F1_Dams	10	46.07	NA	NA
94	4	M_LE	10_Litter	P_LE	F1_Dams	10	50.49	NA	NA
95	5	M_LE	10_Litter	P_LE	F1_Dams	10	48.55	NA	NA
96	6	M_LE	10_Litter	P_LE	F1_Dams	10	48.53	NA	NA
97	7	M_HE	10_Litter	P_LE	F1_Dams	10	42.38	NA	NA
98	8	M_HE	10_Litter	P_LE	F1_Dams	10	46.40	NA	NA
99	9	M_HE	10_Litter	P_LE	F1_Dams	10	42.97	NA	NA
100	10	M_HE	10_Litter	P_LE	F1_Dams	10	49.06	NA	NA
101	11	M_HE	10_Litter	P_LE	F1_Dams	10	45.72	NA	NA
102	12	M_HE	10_Litter	P_LE	F1_Dams	10	47.78	NA	NA
103	13	M_LE	5_Litter	P_LE	F1_Dams	10	52.52	NA	NA
104	14	M_LE	5_Litter	P_LE	F1_Dams	10	51.42	NA	NA
105	15	M_LE	5_Litter	P_LE	F1_Dams	10	48.76	NA	NA
106	16	M_LE	5_Litter	P_LE	F1_Dams	10	50.83	NA	NA
107	17	M_LE	5_Litter	P_LE	F1_Dams	10	51.33	NA	NA
108	18	M_LE	5_Litter	P_LE	F1_Dams	10	61.98	NA	NA
109	19	M_HE	5_Litter	P_LE	F1_Dams	10	51.63	NA	NA
110	20	M_HE	5_Litter	P_LE	F1_Dams	10	47.27	NA	NA
111	21	M_HE	5_Litter	P_LE	F1_Dams	10	45.62	NA	NA
112	22	M_HE	5_Litter	P_HE	F1_Dams	10	63.96	NA	NA
113	23	M_HE	5_Litter	P_HE	F1_Dams	10	66.45	NA	NA
114	24	M_HE	5_Litter	P_HE	F1_Dams	10	56.28	NA	NA
115	25	M_HE	5_Litter	P_HE	F1_Dams	10	73.82	NA	NA
116	26	M_HE	5_Litter	P_HE	F1_Dams	10	58.41	NA	NA
117	27	M_HE	5_Litter	P_HE	F1_Dams	10	75.97	NA	NA
118	28	M_HE	5_Litter	P_HE	F1_Dams	10	77.88	NA	NA
119	29	M_LE	5_Litter	P_HE	F1_Dams	10	50.23	NA	NA
120	30	M_LE	5_Litter	P_HE	F1_Dams	10	59.21	NA	NA
121	31	M_LE	5_Litter	P_HE	F1_Dams	10	54.12	NA	NA
122	32	M_LE	5_Litter	P_HE	F1_Dams	10	53.25	NA	NA
123	33	M_LE	5_Litter	P_HE	F1_Dams	10	48.67	NA	NA
124	34	M_HE	10_Litter	P_HE	F1_Dams	10	50.43	NA	NA
125	35	M_HE	10_Litter	P_HE	F1_Dams	10	61.70	NA	NA
126	36	M_HE	10_Litter	P_HE	F1_Dams	10	46.75	NA	NA
127	37	M_HE	10_Litter	P_HE	F1_Dams	10	59.80	NA	NA
128	38	M_HE	10_Litter	P_HE	F1_Dams	10	56.62	NA	NA
129	39	M_HE	10_Litter	P_HE	F1_Dams	10	57.08	NA	NA
130	40	M_HE	10_Litter	P_HE	F1_Dams	10	59.14	NA	NA
131	41	M_LE	10_Litter	P_HE	F1_Dams	10	54.52	NA	NA
132	42	M_LE	10_Litter	P_HE	F1_Dams	10	65.66	NA	NA
133	43	M_LE	10_Litter	P_HE	F1_Dams	10	48.70	NA	NA
134	44	M_LE	10_Litter	P_HE	F1_Dams	10	51.77	NA	NA
135	45	M_LE	10_Litter	P_HE	F1_Dams	10	51.63	NA	NA
136	1	M_LE	10_Litter	P_LE	F1_Dams	14	50.26	NA	NA
137	2	M_LE	10_Litter	P_LE	F1_Dams	14	50.59	NA	NA
138	3	M_LE	10_Litter	P_LE	F1_Dams	14	49.07	NA	NA
139	4	M_LE	10_Litter	P_LE	F1_Dams	14	50.32	NA	NA
140	5	M_LE	10_Litter	P_LE	F1_Dams	14	48.29	NA	NA
141	6	M_LE	10_Litter	P_LE	F1_Dams	14	49.67	NA	NA
142	7	M_HE	10_Litter	P_LE	F1_Dams	14	46.41	NA	NA
143	8	M_HE	10_Litter	P_LE	F1_Dams	14	47.63	NA	NA
144	9	M_HE	10_Litter	P_LE	F1_Dams	14	44.92	NA	NA
145	10	M_HE	10_Litter	P_LE	F1_Dams	14	51.45	NA	NA
146	11	M_HE	10_Litter	P_LE	F1_Dams	14	46.53	NA	NA
147	12	M_HE	10_Litter	P_LE	F1_Dams	14	47.21	NA	NA
148	13	M_LE	5_Litter	P_LE	F1_Dams	14	52.45	NA	NA
149	14	M_LE	5_Litter	P_LE	F1_Dams	14	53.44	NA	NA
150	15	M_LE	5_Litter	P_LE	F1_Dams	14	49.25	NA	NA
151	16	M_LE	5_Litter	P_LE	F1_Dams	14	52.48	NA	NA
152	17	M_LE	5_Litter	P_LE	F1_Dams	14	56.48	NA	NA
153	18	M_LE	5_Litter	P_LE	F1_Dams	14	58.69	NA	NA
154	19	M_HE	5_Litter	P_LE	F1_Dams	14	51.92	NA	NA
155	20	M_HE	5_Litter	P_LE	F1_Dams	14	46.54	NA	NA
156	21	M_HE	5_Litter	P_LE	F1_Dams	14	46.36	NA	NA
157	22	M_HE	5_Litter	P_HE	F1_Dams	14	66.93	NA	NA
158	23	M_HE	5_Litter	P_HE	F1_Dams	14	62.33	NA	NA
159	24	M_HE	5_Litter	P_HE	F1_Dams	14	55.00	NA	NA
160	25	M_HE	5_Litter	P_HE	F1_Dams	14	71.46	NA	NA
161	26	M_HE	5_Litter	P_HE	F1_Dams	14	62.86	NA	NA
162	27	M_HE	5_Litter	P_HE	F1_Dams	14	72.43	NA	NA
163	28	M_HE	5_Litter	P_HE	F1_Dams	14	74.62	NA	NA
164	29	M_LE	5_Litter	P_HE	F1_Dams	14	54.12	NA	NA
165	30	M_LE	5_Litter	P_HE	F1_Dams	14	63.56	NA	NA
166	31	M_LE	5_Litter	P_HE	F1_Dams	14	53.04	NA	NA
167	32	M_LE	5_Litter	P_HE	F1_Dams	14	53.86	NA	NA
168	33	M_LE	5_Litter	P_HE	F1_Dams	14	50.37	NA	NA
169	34	M_HE	10_Litter	P_HE	F1_Dams	14	51.37	NA	NA
170	35	M_HE	10_Litter	P_HE	F1_Dams	14	61.05	NA	NA
171	36	M_HE	10_Litter	P_HE	F1_Dams	14	47.58	NA	NA
172	37	M_HE	10_Litter	P_HE	F1_Dams	14	57.70	NA	NA
173	38	M_HE	10_Litter	P_HE	F1_Dams	14	59.31	NA	NA
174	39	M_HE	10_Litter	P_HE	F1_Dams	14	56.71	NA	NA
175	40	M_HE	10_Litter	P_HE	F1_Dams	14	55.33	NA	NA
176	41	M_LE	10_Litter	P_HE	F1_Dams	14	53.42	NA	NA
177	42	M_LE	10_Litter	P_HE	F1_Dams	14	66.47	NA	NA
178	43	M_LE	10_Litter	P_HE	F1_Dams	14	49.06	NA	NA
179	44	M_LE	10_Litter	P_HE	F1_Dams	14	48.55	NA	NA
180	45	M_LE	10_Litter	P_HE	F1_Dams	14	51.50	NA	NA
181	1	M_LE	10_Litter	P_LE	F1_Dams	18	46.29	NA	NA
182	2	M_LE	10_Litter	P_LE	F1_Dams	18	49.74	NA	NA
183	3	M_LE	10_Litter	P_LE	F1_Dams	18	46.80	NA	NA
184	4	M_LE	10_Litter	P_LE	F1_Dams	18	46.66	NA	NA
185	5	M_LE	10_Litter	P_LE	F1_Dams	18	44.53	NA	NA
186	6	M_LE	10_Litter	P_LE	F1_Dams	18	47.00	NA	NA
187	7	M_HE	10_Litter	P_LE	F1_Dams	18	47.40	NA	NA
188	8	M_HE	10_Litter	P_LE	F1_Dams	18	44.26	NA	NA
189	9	M_HE	10_Litter	P_LE	F1_Dams	18	45.59	NA	NA
190	10	M_HE	10_Litter	P_LE	F1_Dams	18	50.10	NA	NA
191	11	M_HE	10_Litter	P_LE	F1_Dams	18	44.33	NA	NA
192	12	M_HE	10_Litter	P_LE	F1_Dams	18	46.27	NA	NA
193	13	M_LE	5_Litter	P_LE	F1_Dams	18	51.77	NA	NA
194	14	M_LE	5_Litter	P_LE	F1_Dams	18	49.76	NA	NA
195	15	M_LE	5_Litter	P_LE	F1_Dams	18	47.50	NA	NA
196	16	M_LE	5_Litter	P_LE	F1_Dams	18	49.10	NA	NA
197	17	M_LE	5_Litter	P_LE	F1_Dams	18	52.62	NA	NA
198	18	M_LE	5_Litter	P_LE	F1_Dams	18	53.50	NA	NA
199	19	M_HE	5_Litter	P_LE	F1_Dams	18	47.50	NA	NA
200	20	M_HE	5_Litter	P_LE	F1_Dams	18	46.10	NA	NA
201	21	M_HE	5_Litter	P_LE	F1_Dams	18	47.00	NA	NA
202	22	M_HE	5_Litter	P_HE	F1_Dams	18	63.59	NA	NA
203	23	M_HE	5_Litter	P_HE	F1_Dams	18	57.49	NA	NA
204	24	M_HE	5_Litter	P_HE	F1_Dams	18	52.70	NA	NA
205	25	M_HE	5_Litter	P_HE	F1_Dams	18	63.38	NA	NA
206	26	M_HE	5_Litter	P_HE	F1_Dams	18	59.90	NA	NA
207	27	M_HE	5_Litter	P_HE	F1_Dams	18	67.86	NA	NA
208	28	M_HE	5_Litter	P_HE	F1_Dams	18	67.32	NA	NA
209	29	M_LE	5_Litter	P_HE	F1_Dams	18	44.46	NA	NA
210	30	M_LE	5_Litter	P_HE	F1_Dams	18	57.65	NA	NA
211	31	M_LE	5_Litter	P_HE	F1_Dams	18	50.96	NA	NA
212	32	M_LE	5_Litter	P_HE	F1_Dams	18	51.47	NA	NA
213	33	M_LE	5_Litter	P_HE	F1_Dams	18	51.08	NA	NA
214	34	M_HE	10_Litter	P_HE	F1_Dams	18	50.30	NA	NA
215	35	M_HE	10_Litter	P_HE	F1_Dams	18	56.74	NA	NA
216	36	M_HE	10_Litter	P_HE	F1_Dams	18	50.50	NA	NA

## Sheet: FIg_5B
Sample	Animal	Maternal_diet	Litter_size	Post_weaning_diet	Generation	Day	Weight
1	1	M_LE	10_Litter	P_LE	F2_Litter	1	19.24
2	2	M_LE	10_Litter	P_LE	F2_Litter	1	17.63
3	3	M_LE	10_Litter	P_LE	F2_Litter	1	15.82
4	4	M_LE	10_Litter	P_LE	F2_Litter	1	16.88
5	5	M_LE	10_Litter	P_LE	F2_Litter	1	16.16
6	6	M_LE	10_Litter	P_LE	F2_Litter	1	20.73
7	7	M_HE	10_Litter	P_LE	F2_Litter	1	16.56
8	8	M_HE	10_Litter	P_LE	F2_Litter	1	16.51
9	9	M_HE	10_Litter	P_LE	F2_Litter	1	16.14
10	10	M_HE	10_Litter	P_LE	F2_Litter	1	18.15
11	11	M_HE	10_Litter	P_LE	F2_Litter	1	18.26
12	12	M_HE	10_Litter	P_LE	F2_Litter	1	18.43
13	13	M_LE	5_Litter	P_LE	F2_Litter	1	14.30
14	14	M_LE	5_Litter	P_LE	F2_Litter	1	21.85
15	15	M_LE	5_Litter	P_LE	F2_Litter	1	2023-12-18
16	16	M_LE	5_Litter	P_LE	F2_Litter	1	16.37
17	17	M_LE	5_Litter	P_LE	F2_Litter	1	18.45
18	18	M_LE	5_Litter	P_LE	F2_Litter	1	15.96
19	19	M_HE	5_Litter	P_LE	F2_Litter	1	2023-12-19
20	20	M_HE	5_Litter	P_LE	F2_Litter	1	20.27
21	21	M_HE	5_Litter	P_LE	F2_Litter	1	18.57
22	22	M_HE	5_Litter	P_HE	F2_Litter	1	13.20
23	23	M_HE	5_Litter	P_HE	F2_Litter	1	13.40
24	24	M_HE	5_Litter	P_HE	F2_Litter	1	14.52
25	25	M_HE	5_Litter	P_HE	F2_Litter	1	16.45
26	26	M_HE	5_Litter	P_HE	F2_Litter	1	16.59
27	27	M_HE	5_Litter	P_HE	F2_Litter	1	15.89
28	28	M_HE	5_Litter	P_HE	F2_Litter	1	14.35
29	29	M_LE	5_Litter	P_HE	F2_Litter	1	19.00
30	30	M_LE	5_Litter	P_HE	F2_Litter	1	15.91
31	31	M_LE	5_Litter	P_HE	F2_Litter	1	16.79
32	32	M_LE	5_Litter	P_HE	F2_Litter	1	17.14
33	33	M_LE	5_Litter	P_HE	F2_Litter	1	14.84
34	34	M_HE	10_Litter	P_HE	F2_Litter	1	13.23
35	35	M_HE	10_Litter	P_HE	F2_Litter	1	16.38
36	36	M_HE	10_Litter	P_HE	F2_Litter	1	16.53
37	37	M_HE	10_Litter	P_HE	F2_Litter	1	15.17
38	38	M_HE	10_Litter	P_HE	F2_Litter	1	14.20
39	39	M_HE	10_Litter	P_HE	F2_Litter	1	17.48
40	40	M_HE	10_Litter	P_HE	F2_Litter	1	17.80
41	41	M_LE	10_Litter	P_HE	F2_Litter	1	15.42
42	42	M_LE	10_Litter	P_HE	F2_Litter	1	15.79
43	43	M_LE	10_Litter	P_HE	F2_Litter	1	16.76
44	44	M_LE	10_Litter	P_HE	F2_Litter	1	2023-07-15
45	45	M_LE	10_Litter	P_HE	F2_Litter	1	2023-06-16
46	1	M_LE	10_Litter	P_LE	F2_Litter	2	23.31
47	2	M_LE	10_Litter	P_LE	F2_Litter	2	20.92
48	3	M_LE	10_Litter	P_LE	F2_Litter	2	2023-06-19
49	4	M_LE	10_Litter	P_LE	F2_Litter	2	20.60
50	5	M_LE	10_Litter	P_LE	F2_Litter	2	20.33
51	6	M_LE	10_Litter	P_LE	F2_Litter	2	24.58
52	7	M_HE	10_Litter	P_LE	F2_Litter	2	20.36
53	8	M_HE	10_Litter	P_LE	F2_Litter	2	19.26
54	9	M_HE	10_Litter	P_LE	F2_Litter	2	19.13
55	10	M_HE	10_Litter	P_LE	F2_Litter	2	18.85
56	11	M_HE	10_Litter	P_LE	F2_Litter	2	21.31
57	12	M_HE	10_Litter	P_LE	F2_Litter	2	21.95
58	13	M_LE	5_Litter	P_LE	F2_Litter	2	20.40
59	14	M_LE	5_Litter	P_LE	F2_Litter	2	2023-08-26
60	15	M_LE	5_Litter	P_LE	F2_Litter	2	20.85
61	16	M_LE	5_Litter	P_LE	F2_Litter	2	2023-07-20
62	17	M_LE	5_Litter	P_LE	F2_Litter	2	2023-10-23
63	18	M_LE	5_Litter	P_LE	F2_Litter	2	19.65
64	19	M_HE	5_Litter	P_LE	F2_Litter	2	23.94
65	20	M_HE	5_Litter	P_LE	F2_Litter	2	24.15
66	21	M_HE	5_Litter	P_LE	F2_Litter	2	22.72
67	22	M_HE	5_Litter	P_HE	F2_Litter	2	14.18
68	23	M_HE	5_Litter	P_HE	F2_Litter	2	14.27
69	24	M_HE	5_Litter	P_HE	F2_Litter	2	2023-01-17
70	25	M_HE	5_Litter	P_HE	F2_Litter	2	18.37
71	26	M_HE	5_Litter	P_HE	F2_Litter	2	16.40
72	27	M_HE	5_Litter	P_HE	F2_Litter	2	16.75
73	28	M_HE	5_Litter	P_HE	F2_Litter	2	13.96
74	29	M_LE	5_Litter	P_HE	F2_Litter	2	22.81
75	30	M_LE	5_Litter	P_HE	F2_Litter	2	18.20
76	31	M_LE	5_Litter	P_HE	F2_Litter	2	21.65
77	32	M_LE	5_Litter	P_HE	F2_Litter	2	20.48
78	33	M_LE	5_Litter	P_HE	F2_Litter	2	16.54
79	34	M_HE	10_Litter	P_HE	F2_Litter	2	14.48
80	35	M_HE	10_Litter	P_HE	F2_Litter	2	18.91
81	36	M_HE	10_Litter	P_HE	F2_Litter	2	19.30
82	37	M_HE	10_Litter	P_HE	F2_Litter	2	17.69
83	38	M_HE	10_Litter	P_HE	F2_Litter	2	17.53
84	39	M_HE	10_Litter	P_HE	F2_Litter	2	17.64
85	40	M_HE	10_Litter	P_HE	F2_Litter	2	19.30
86	41	M_LE	10_Litter	P_HE	F2_Litter	2	16.38
87	42	M_LE	10_Litter	P_HE	F2_Litter	2	15.96
88	43	M_LE	10_Litter	P_HE	F2_Litter	2	17.98
89	44	M_LE	10_Litter	P_HE	F2_Litter	2	16.18
90	45	M_LE	10_Litter	P_HE	F2_Litter	2	16.35
91	1	M_LE	10_Litter	P_LE	F2_Litter	10	73.93
92	2	M_LE	10_Litter	P_LE	F2_Litter	10	65.43
93	3	M_LE	10_Litter	P_LE	F2_Litter	10	63.02
94	4	M_LE	10_Litter	P_LE	F2_Litter	10	71.76
95	5	M_LE	10_Litter	P_LE	F2_Litter	10	69.11
96	6	M_LE	10_Litter	P_LE	F2_Litter	10	71.72
97	7	M_HE	10_Litter	P_LE	F2_Litter	10	70.07
98	8	M_HE	10_Litter	P_LE	F2_Litter	10	58.35
99	9	M_HE	10_Litter	P_LE	F2_Litter	10	66.34
100	10	M_HE	10_Litter	P_LE	F2_Litter	10	65.61
101	11	M_HE	10_Litter	P_LE	F2_Litter	10	70.96
102	12	M_HE	10_Litter	P_LE	F2_Litter	10	70.35
103	13	M_LE	5_Litter	P_LE	F2_Litter	10	72.01
104	14	M_LE	5_Litter	P_LE	F2_Litter	10	72.36
105	15	M_LE	5_Litter	P_LE	F2_Litter	10	64.15
106	16	M_LE	5_Litter	P_LE	F2_Litter	10	64.83
107	17	M_LE	5_Litter	P_LE	F2_Litter	10	71.33
108	18	M_LE	5_Litter	P_LE	F2_Litter	10	66.31
109	19	M_HE	5_Litter	P_LE	F2_Litter	10	68.58
110	20	M_HE	5_Litter	P_LE	F2_Litter	10	69.78
111	21	M_HE	5_Litter	P_LE	F2_Litter	10	67.52
112	22	M_HE	5_Litter	P_HE	F2_Litter	10	53.61
113	23	M_HE	5_Litter	P_HE	F2_Litter	10	50.98
114	24	M_HE	5_Litter	P_HE	F2_Litter	10	61.73
115	25	M_HE	5_Litter	P_HE	F2_Litter	10	69.24
116	26	M_HE	5_Litter	P_HE	F2_Litter	10	61.36
117	27	M_HE	5_Litter	P_HE	F2_Litter	10	65.09
118	28	M_HE	5_Litter	P_HE	F2_Litter	10	57.32
119	29	M_LE	5_Litter	P_HE	F2_Litter	10	67.32
120	30	M_LE	5_Litter	P_HE	F2_Litter	10	68.26
121	31	M_LE	5_Litter	P_HE	F2_Litter	10	74.65
122	32	M_LE	5_Litter	P_HE	F2_Litter	10	61.73
123	33	M_LE	5_Litter	P_HE	F2_Litter	10	60.14
124	34	M_HE	10_Litter	P_HE	F2_Litter	10	48.56
125	35	M_HE	10_Litter	P_HE	F2_Litter	10	72.35
126	36	M_HE	10_Litter	P_HE	F2_Litter	10	63.07
127	37	M_HE	10_Litter	P_HE	F2_Litter	10	66.42
128	38	M_HE	10_Litter	P_HE	F2_Litter	10	60.32
129	39	M_HE	10_Litter	P_HE	F2_Litter	10	62.83
130	40	M_HE	10_Litter	P_HE	F2_Litter	10	64.55
131	41	M_LE	10_Litter	P_HE	F2_Litter	10	58.36
132	42	M_LE	10_Litter	P_HE	F2_Litter	10	66.41
133	43	M_LE	10_Litter	P_HE	F2_Litter	10	66.39
134	44	M_LE	10_Litter	P_HE	F2_Litter	10	58.67
135	45	M_LE	10_Litter	P_HE	F2_Litter	10	58.52
136	1	M_LE	10_Litter	P_LE	F2_Litter	14	96.04
137	2	M_LE	10_Litter	P_LE	F2_Litter	14	88.40
138	3	M_LE	10_Litter	P_LE	F2_Litter	14	85.18
139	4	M_LE	10_Litter	P_LE	F2_Litter	14	94.39
140	5	M_LE	10_Litter	P_LE	F2_Litter	14	94.06
141	6	M_LE	10_Litter	P_LE	F2_Litter	14	97.48
142	7	M_HE	10_Litter	P_LE	F2_Litter	14	95.78
143	8	M_HE	10_Litter	P_LE	F2_Litter	14	75.27
144	9	M_HE	10_Litter	P_LE	F2_Litter	14	86.61
145	10	M_HE	10_Litter	P_LE	F2_Litter	14	91.61
146	11	M_HE	10_Litter	P_LE	F2_Litter	14	93.97
147	12	M_HE	10_Litter	P_LE	F2_Litter	14	91.60
148	13	M_LE	5_Litter	P_LE	F2_Litter	14	97.08
149	14	M_LE	5_Litter	P_LE	F2_Litter	14	94.68
150	15	M_LE	5_Litter	P_LE	F2_Litter	14	88.29
151	16	M_LE	5_Litter	P_LE	F2_Litter	14	95.27
152	17	M_LE	5_Litter	P_LE	F2_Litter	14	94.78
153	18	M_LE	5_Litter	P_LE	F2_Litter	14	84.21
154	19	M_HE	5_Litter	P_LE	F2_Litter	14	87.21
155	20	M_HE	5_Litter	P_LE	F2_Litter	14	87.74
156	21	M_HE	5_Litter	P_LE	F2_Litter	14	92.13
157	22	M_HE	5_Litter	P_HE	F2_Litter	14	77.35
158	23	M_HE	5_Litter	P_HE	F2_Litter	14	78.30
159	24	M_HE	5_Litter	P_HE	F2_Litter	14	86.80
160	25	M_HE	5_Litter	P_HE	F2_Litter	14	95.86
161	26	M_HE	5_Litter	P_HE	F2_Litter	14	88.38
162	27	M_HE	5_Litter	P_HE	F2_Litter	14	91.32
163	28	M_HE	5_Litter	P_HE	F2_Litter	14	84.69
164	29	M_LE	5_Litter	P_HE	F2_Litter	14	92.64
165	30	M_LE	5_Litter	P_HE	F2_Litter	14	96.19
166	31	M_LE	5_Litter	P_HE	F2_Litter	14	100.02
167	32	M_LE	5_Litter	P_HE	F2_Litter	14	84.68
168	33	M_LE	5_Litter	P_HE	F2_Litter	14	84.79
169	34	M_HE	10_Litter	P_HE	F2_Litter	14	69.15
170	35	M_HE	10_Litter	P_HE	F2_Litter	14	96.89
171	36	M_HE	10_Litter	P_HE	F2_Litter	14	87.51
172	37	M_HE	10_Litter	P_HE	F2_Litter	14	89.80
173	38	M_HE	10_Litter	P_HE	F2_Litter	14	83.10
174	39	M_HE	10_Litter	P_HE	F2_Litter	14	89.43
175	40	M_HE	10_Litter	P_HE	F2_Litter	14	85.94
176	41	M_LE	10_Litter	P_HE	F2_Litter	14	79.75
177	42	M_LE	10_Litter	P_HE	F2_Litter	14	92.18
178	43	M_LE	10_Litter	P_HE	F2_Litter	14	91.72
179	44	M_LE	10_Litter	P_HE	F2_Litter	14	77.42
180	45	M_LE	10_Litter	P_HE	F2_Litter	14	79.13
181	1	M_LE	10_Litter	P_LE	F2_Litter	18	119.71
182	2	M_LE	10_Litter	P_LE	F2_Litter	18	111.13
183	3	M_LE	10_Litter	P_LE	F2_Litter	18	105.00
184	4	M_LE	10_Litter	P_LE	F2_Litter	18	115.45
185	5	M_LE	10_Litter	P_LE	F2_Litter	18	117.81
186	6	M_LE	10_Litter	P_LE	F2_Litter	18	120.60
187	7	M_HE	10_Litter	P_LE	F2_Litter	18	113.05
188	8	M_HE	10_Litter	P_LE	F2_Litter	18	98.03
189	9	M_HE	10_Litter	P_LE	F2_Litter	18	107.12
190	10	M_HE	10_Litter	P_LE	F2_Litter	18	115.20
191	11	M_HE	10_Litter	P_LE	F2_Litter	18	120.75
192	12	M_HE	10_Litter	P_LE	F2_Litter	18	113.29
193	13	M_LE	5_Litter	P_LE	F2_Litter	18	120.75
194	14	M_LE	5_Litter	P_LE	F2_Litter	18	111.05
195	15	M_LE	5_Litter	P_LE	F2_Litter	18	104.30
196	16	M_LE	5_Litter	P_LE	F2_Litter	18	115.50
197	17	M_LE	5_Litter	P_LE	F2_Litter	18	123.54
198	18	M_LE	5_Litter	P_LE	F2_Litter	18	101.50
199	19	M_HE	5_Litter	P_LE	F2_Litter	18	100.40
200	20	M_HE	5_Litter	P_LE	F2_Litter	18	113.50
201	21	M_HE	5_Litter	P_LE	F2_Litter	18	120.42
202	22	M_HE	5_Litter	P_HE	F2_Litter	18	98.52
203	23	M_HE	5_Litter	P_HE	F2_Litter	18	100.82
204	24	M_HE	5_Litter	P_HE	F2_Litter	18	111.75
205	25	M_HE	5_Litter	P_HE	F2_Litter	18	123.25
206	26	M_HE	5_Litter	P_HE	F2_Litter	18	108.80
207	27	M_HE	5_Litter	P_HE	F2_Litter	18	110.25
208	28	M_HE	5_Litter	P_HE	F2_Litter	18	102.85
209	29	M_LE	5_Litter	P_HE	F2_Litter	18	118.67
210	30	M_LE	5_Litter	P_HE	F2_Litter	18	116.50
211	31	M_LE	5_Litter	P_HE	F2_Litter	18	129.02
212	32	M_LE	5_Litter	P_HE	F2_Litter	18	106.53
213	33	M_LE	5_Litter	P_HE	F2_Litter	18	109.86
214	34	M_HE	10_Litter	P_HE	F2_Litter	18	86.50
215	35	M_HE	10_Litter	P_HE	F2_Litter	18	120.12
216	36	M_HE	10_Litter	P_HE	F2_Litter	18	112.80
