# Supplementary material for: Effect of a Diet-Induced Obesity on the Progeny Response in a Murine Model
Source: MDPI journal article supplement (doi:10.3390/nu15234970), 2023-11-30
Supplement: s1 [file nutrients-2632981-supplementary.pdf › nutrients-2632981-supplementary.pdf]

Supplementary files

**Table S1.** Subcutaneous, abdominal and perirenal fat weight, plus liver, left and right kidneys, heart, spleen and full gastrointestinal weight (LSM  $\pm$  SEM) in F1 males at 74 days old (age at slaughter)

| Post weaning diet     | P_HE            | P_HE            | P_HE            | P_HE            | P_LE            | P_LE            | P_LE            | P_LE            |
|-----------------------|-----------------|-----------------|-----------------|-----------------|-----------------|-----------------|-----------------|-----------------|
| Maternal diet         | M_HE            | M_HE            | M_LE            | M_LE            | M_HE            | M_HE            | M_LE            | M_LE            |
| Litter size           | 10_litter       | 5_litter        | 10_litter       | 5_litter        | 10_litter       | 5_litter        | 10_litter       | 5_litter        |
|                       | (n=6)           | (n=6)           | (n=6)           | (n=5)           | (n=6)           | (n=6)           | (n=6)           | (n=6)           |
| Subcutaneous fat      | 1.08 $\pm$ 0.14 | 1.10 $\pm$ 0.14 | 1.04 $\pm$ 0.14 | 0.79 $\pm$ 0.16 | 0.48 $\pm$ 0.14 | 0.42 $\pm$ 0.14 | 0.48 $\pm$ 0.14 | 0.29 $\pm$ 0.14 |
| Abdominal fat         | 1.62 $\pm$ 0.29 | 1.94 $\pm$ 0.29 | 1.50 $\pm$ 0.29 | 1.15 $\pm$ 0.31 | 0.76 $\pm$ 0.29 | 0.66 $\pm$ 0.29 | 0.73 $\pm$ 0.29 | 0.60 $\pm$ 0.29 |
| Perirenal fat         | 0.41 $\pm$ 0.07 | 0.59 $\pm$ 0.07 | 0.35 $\pm$ 0.07 | 0.27 $\pm$ 0.07 | 0.13 $\pm$ 0.07 | 0.14 $\pm$ 0.07 | 0.07 $\pm$ 0.07 | 0.05 $\pm$ 0.07 |
| Liver                 | 2.15 $\pm$ 0.11 | 2.17 $\pm$ 0.11 | 2.29 $\pm$ 0.11 | 2.43 $\pm$ 0.12 | 1.89 $\pm$ 0.11 | 2.12 $\pm$ 0.11 | 1.95 $\pm$ 0.11 | 2.34 $\pm$ 0.11 |
| Left kidney           | 0.34 $\pm$ 0.02 | 0.34 $\pm$ 0.02 | 0.33 $\pm$ 0.02 | 0.36 $\pm$ 0.02 | 0.30 $\pm$ 0.02 | 0.32 $\pm$ 0.02 | 0.30 $\pm$ 0.02 | 0.30 $\pm$ 0.02 |
| Right kidney          | 0.36 $\pm$ 0.02 | 0.38 $\pm$ 0.02 | 0.39 $\pm$ 0.02 | 0.36 $\pm$ 0.02 | 0.30 $\pm$ 0.02 | 0.35 $\pm$ 0.02 | 0.29 $\pm$ 0.02 | 0.31 $\pm$ 0.02 |
| Heart                 | 0.33 $\pm$ 0.02 | 0.34 $\pm$ 0.02 | 0.28 $\pm$ 0.02 | 0.33 $\pm$ 0.02 | 0.25 $\pm$ 0.02 | 0.27 $\pm$ 0.02 | 0.24 $\pm$ 0.02 | 0.30 $\pm$ 0.02 |
| Spleen                | 0.24 $\pm$ 0.03 | 0.24 $\pm$ 0.03 | 0.22 $\pm$ 0.03 | 0.29 $\pm$ 0.03 | 0.17 $\pm$ 0.03 | 0.22 $\pm$ 0.03 | 0.18 $\pm$ 0.03 | 0.21 $\pm$ 0.03 |
| Full gastrointestinal | 5.01 $\pm$ 0.29 | 5.10 $\pm$ 0.29 | 4.82 $\pm$ 0.29 | 5.43 $\pm$ 0.32 | 5.91 $\pm$ 0.29 | 6.13 $\pm$ 0.29 | 5.41 $\pm$ 0.29 | 6.08 $\pm$ 0.29 |

P\_HE, High energy post weaning diet; P\_LE, Low energy post weaning diet; M\_HE, High energy maternal diet; M\_LE, Low energy maternal diet; 10\_litter, litter adjusted to 10 pups; 5\_litter, litter adjusted to 5 pups.

**Table S2.** Abdominal fat plus left and right mammary glands weights (LSM  $\pm$  SEM) in F1 female at day 18 of lactation of F2 (age of slaughter)

| Post weaning diet | P_HE            | P_HE            | P_HE            | P_HE            | P_LE            | P_LE            | P_LE            | P_LE            |
|-------------------|-----------------|-----------------|-----------------|-----------------|-----------------|-----------------|-----------------|-----------------|
| Maternal diet     | M_HE            | M_HE            | M_LE            | M_LE            | M_HE            | M_HE            | M_LE            | M_LE            |
| Litter size       | 10_litter       | 5_litter        | 10_litter       | 5_litter        | 10_litter       | 5_litter        | 10_litter       | 5_litter        |
|                   | (n=7)           | (n=7)           | (n=5)           | (n=5)           | (n=6)           | (n=3)           | (n=6)           | (n=6)           |
| Abdominal fat     | 1.10 $\pm$ 0.31 | 2.85 $\pm$ 0.31 | 1.27 $\pm$ 0.36 | 1.04 $\pm$ 0.36 | 0.12 $\pm$ 0.33 | 0.20 $\pm$ 0.47 | 0.13 $\pm$ 0.33 | 0.37 $\pm$ 0.33 |
| Left glands       | 0.74 $\pm$ 0.06 | 0.92 $\pm$ 0.06 | 0.73 $\pm$ 0.07 | 0.62 $\pm$ 0.07 | 0.60 $\pm$ 0.07 | 0.51 $\pm$ 0.10 | 0.44 $\pm$ 0.02 | 0.56 $\pm$ 0.07 |
| Right glands      | 0.73 $\pm$ 0.05 | 0.96 $\pm$ 0.05 | 0.71 $\pm$ 0.06 | 0.61 $\pm$ 0.06 | 0.45 $\pm$ 0.05 | 0.52 $\pm$ 0.08 | 0.43 $\pm$ 0.05 | 0.53 $\pm$ 0.05 |

P\_HE, High energy post weaning diet; P\_LE, Low energy post weaning diet; M\_HE, High energy maternal diet; M\_LE, Low energy maternal diet; 10\_litter, litter adjusted to 10 pups; 5\_litter, litter adjusted to 5 pups.

**Table S3.** F1 female body weight and F2 offspring growth slopes p-values (LSM  $\pm$  SEM) during lactation

| Post weaning diet   | P_HE            | P_HE            | P_HE            | P_HE            | P_LE            | P_LE            | P_LE            | P_LE            |
|---------------------|-----------------|-----------------|-----------------|-----------------|-----------------|-----------------|-----------------|-----------------|
| Maternal diet       | M_HE            | M_HE            | M_LE            | M_LE            | M_HE            | M_HE            | M_LE            | M_LE            |
| Litter size         | 10_litter       | 5_litter        | 10_litter       | 5_litter        | 10_litter       | 5_litter        | 10_litter       | 5_litter        |
| F1 female BW        | 0.24 $\pm$ 0.33 | 0.23 $\pm$ 0.46 | 0.12 $\pm$ 0.26 | 0.56 $\pm$ 0.29 | 0.49 $\pm$ 0.20 | 0.54 $\pm$ 0.05 | 0.66 $\pm$ 0.19 | 0.76 $\pm$ 0.13 |
| F2 offspring growth | 5.69 $\pm$ 0.59 | 5.81 $\pm$ 0.40 | 5.58 $\pm$ 0.48 | 6.02 $\pm$ 0.48 | 5.73 $\pm$ 0.50 | 5.47 $\pm$ 0.49 | 5.89 $\pm$ 0.28 | 5.76 $\pm$ 0.48 |

P\_HE, High energy post weaning diet; P\_LE, Low energy post weaning diet; M\_HE, High energy maternal diet; M\_LE, Low energy maternal diet; 10\_litter, litter adjusted to 10 pups; 5\_litter, litter adjusted to 5 pups.
